# Supplementary material for: CAR T cells with dual targeting of CD19 and CD22 in pediatric and young adult patients with relapsed or refractory B cell acute lymphoblastic leukemia: a phase 1 trial
Source: PubMed Central journal article supplement (PMC8516648; doi:10.1038/s41591-021-01497-1), 2021-10-12
Supplement: 41591_2021_1497_MOESM1_ESM.pdf [file 41591_2021_1497_MOESM1_ESM.pdf]

---

**Supplementary information**

---

**CART cells with dual targeting of CD19 and CD22 in pediatric and young adult patients with relapsed or refractory B cell acute lymphoblastic leukemia: a phase 1 trial**

---

In the format provided by the authors and unedited

# Supplementary Table 1

| Antigen               | Fluorochrome | Clone      | Vol./test or dilution | Supplier                 | Cat.#      | Validation information                                                                                                                                                                                                                                                                                                                                                                                              |
|-----------------------|--------------|------------|-----------------------|--------------------------|------------|---------------------------------------------------------------------------------------------------------------------------------------------------------------------------------------------------------------------------------------------------------------------------------------------------------------------------------------------------------------------------------------------------------------------|
| CCR7                  | PE-Dazzle    | G043H7     | 2.5 µL                | BioLegend                | 353236     | <a href="https://www.biolegend.com/en-us/products/pe-dazzle-594-anti-human-cd197-ccr7-antibody-9811?GroupID=BLG9611">https://www.biolegend.com/en-us/products/pe-dazzle-594-anti-human-cd197-ccr7-antibody-9811?GroupID=BLG9611</a>                                                                                                                                                                                 |
| CD10                  | BV786        | HI10a      | 2.5 µL                | BD Biosciences           | 564960     | <a href="https://www.bdbiosciences.com/en-ca/products/reagents/flow-cytometry-reagents/research-reagents/single-color-antibodies-ruo/bv786-mouse-anti-human-cd10.564960">https://www.bdbiosciences.com/en-ca/products/reagents/flow-cytometry-reagents/research-reagents/single-color-antibodies-ruo/bv786-mouse-anti-human-cd10.564960</a>                                                                         |
| CD123                 | BV421        | 6H6        | 1 µL                  | BioLegend                | 306018     | <a href="https://www.biolegend.com/en-us/products/brilliant-violet-421-anti-human-cd123-antibody-7277">https://www.biolegend.com/en-us/products/brilliant-violet-421-anti-human-cd123-antibody-7277</a>                                                                                                                                                                                                             |
| CD19                  | PE           | SJ25C1     | 0.6 µL                | BD Biosciences           | 345789     | <a href="https://www.bdbiosciences.com/ds/europe/tds/23-5061.pdf">https://www.bdbiosciences.com/ds/europe/tds/23-5061.pdf</a>                                                                                                                                                                                                                                                                                       |
| CD19                  | APC          | SJ25C1     | 0.6 µL                | BD Biosciences           | 345791     | <a href="https://www.bdbiosciences.com/sg/reagents/clinical/reagents/single-antibodies/cd19-apc-sj25c1-also-known-as-sj25-c1/p/345791">https://www.bdbiosciences.com/sg/reagents/clinical/reagents/single-antibodies/cd19-apc-sj25c1-also-known-as-sj25-c1/p/345791</a>                                                                                                                                             |
| CD20                  | APC-H7       | L27        | 2.5 µL                | BD Biosciences           | 641396     | <a href="https://www.bdbiosciences.com/us/applications/research/stem-cell-research/hematopoietic-stem-cell-markers/human/negative-markers/apc-h7-mouse-anti-human-cd20-l27/p/641396">https://www.bdbiosciences.com/us/applications/research/stem-cell-research/hematopoietic-stem-cell-markers/human/negative-markers/apc-h7-mouse-anti-human-cd20-l27/p/641396</a>                                                 |
| CD22                  | PE           | S-HCL-1    | 1.2 µL                | BD Biosciences           | 337899     | <a href="https://www.bdbiosciences.com/ds/europe/tds/23-6995.pdf">https://www.bdbiosciences.com/ds/europe/tds/23-6995.pdf</a>                                                                                                                                                                                                                                                                                       |
| CD27                  | BV711        | M-T271     | 0.31 µL               | BD Biosciences           | 564893     | <a href="https://www.bdbiosciences.com/us/p/564893">https://www.bdbiosciences.com/us/p/564893</a>                                                                                                                                                                                                                                                                                                                   |
| CD28                  | PerCP Cy5.5  | CD28.2     | 1.25 µL               | BioLegend                | 302922     | <a href="https://www.biolegend.com/en-us/products/percp-cyanine55-anti-human-cd28-antibody-4234?GroupID=BLG10175">https://www.biolegend.com/en-us/products/percp-cyanine55-anti-human-cd28-antibody-4234?GroupID=BLG10175</a>                                                                                                                                                                                       |
| CD3                   | APC R700     | SK7        | 1.25 µL               | BD Biosciences           | 659119     | <a href="https://www.bdbiosciences.com/eu/p/659119">https://www.bdbiosciences.com/eu/p/659119</a>                                                                                                                                                                                                                                                                                                                   |
| CD3                   | PE.Cy7       | SK7        | 0.3 µL                | BioLegend                | 344816     | <a href="https://www.biolegend.com/en-us/products/pe-cyanine7-anti-human-cd3-antibody-6934?GroupID=BLG5900">https://www.biolegend.com/en-us/products/pe-cyanine7-anti-human-cd3-antibody-6934?GroupID=BLG5900</a>                                                                                                                                                                                                   |
| CD34                  | APC-R700     | 8G12       | 2.5 µL                | BD Biosciences           | 659123     | <a href="https://www.bdbiosciences.com/en-ca/products/reagents/flow-cytometry-reagents/clinical-discovery-research/single-color-antibodies-ruo-gmp/apc-r700-mouse-anti-human-cd34.659123">https://www.bdbiosciences.com/en-ca/products/reagents/flow-cytometry-reagents/clinical-discovery-research/single-color-antibodies-ruo-gmp/apc-r700-mouse-anti-human-cd34.659123</a>                                       |
| CD4                   | BUV805       | SK3        | 0.32 µL               | BD Biosciences           | 612887     | <a href="https://www.bdbiosciences.com/in/reagents/research/antibodies-buffers/immunology-reagents/anti-human-antibodies/cell-surface-antigens/buv805-mouse-anti-human-cd4-sk3-also-known-as-leu3a/p/612887">https://www.bdbiosciences.com/in/reagents/research/antibodies-buffers/immunology-reagents/anti-human-antibodies/cell-surface-antigens/buv805-mouse-anti-human-cd4-sk3-also-known-as-leu3a/p/612887</a> |
| CD4                   | BUV496       | SK3        | 1 µL                  | BD Biosciences           | 564651     | <a href="https://www.bdbiosciences.com/ds/pm/tds/564651.pdf">https://www.bdbiosciences.com/ds/pm/tds/564651.pdf</a>                                                                                                                                                                                                                                                                                                 |
| CD45                  | BV711        | HI30       | 2.5 µL                | BioLegend                | 304050     | <a href="https://www.biolegend.com/en-us/search-results/brilliant-violet-711-anti-human-cd45-antibody-9736">https://www.biolegend.com/en-us/search-results/brilliant-violet-711-anti-human-cd45-antibody-9736</a>                                                                                                                                                                                                   |
| CD45RA                | BV480        | HI100      | 0.16 µL               | BD Biosciences           | 566114     | <a href="https://www.bdbiosciences.com/eu/applications/research/b-cell-research/surface-markers/human/bv480-mouse-anti-human-cd45ra-hi100/p/566155">https://www.bdbiosciences.com/eu/applications/research/b-cell-research/surface-markers/human/bv480-mouse-anti-human-cd45ra-hi100/p/566155</a>                                                                                                                   |
| CD45RO                | BV605        | UCHL1      | 0.62 µL               | BD Biosciences           | 562791     | <a href="https://www.bdbiosciences.com/eu/p/562791">https://www.bdbiosciences.com/eu/p/562791</a>                                                                                                                                                                                                                                                                                                                   |
| CD62L                 | BV650        | DREG56     | 0.31 µL               | BD Biosciences           | 563808     | <a href="https://www.bdbiosciences.com/us/p/563808">https://www.bdbiosciences.com/us/p/563808</a>                                                                                                                                                                                                                                                                                                                   |
| CD66c                 | FITC         | KOR-SA3544 | 2.5 µL                | Beckman Coulter          | IM2039U    | <a href="https://www.mybeckman.uk/reagents/coulter-flow-cytometry/antibodies-and-kits/single-color-antibodies/cd66c/im2039u">https://www.mybeckman.uk/reagents/coulter-flow-cytometry/antibodies-and-kits/single-color-antibodies/cd66c/im2039u</a>                                                                                                                                                                 |
| CD73                  | BV605        | AD2        | 0.3 µL                | BD Biosciences           | 563199     | <a href="https://www.bdbiosciences.com/en-ca/products/reagents/flow-cytometry-reagents/research-reagents/single-color-antibodies-ruo/bv605-mouse-anti-human-cd73.563199">https://www.bdbiosciences.com/en-ca/products/reagents/flow-cytometry-reagents/research-reagents/single-color-antibodies-ruo/bv605-mouse-anti-human-cd73.563199</a>                                                                         |
| CD8                   | v500         | RPA-T8     | 0.08 µL               | BD Biosciences           | 560774     | <a href="https://www.bdbiosciences.com/en-us/products/reagents/flow-cytometry-reagents/research-reagents/single-color-antibodies-ruo/v500-mouse-anti-human-cd8.560775">https://www.bdbiosciences.com/en-us/products/reagents/flow-cytometry-reagents/research-reagents/single-color-antibodies-ruo/v500-mouse-anti-human-cd8.560775</a>                                                                             |
| CD8                   | BV786        | RPA-T8     | 1.25 µL               | BD Biosciences           | 563823     | <a href="http://www.bdbiosciences.com/us/reagents/research/antibodies-buffers/immunology-reagents/anti-human-antibodies/cell-surface-antigens/bv786-mouse-anti-human-cd8-rpa-t8/p/563823">http://www.bdbiosciences.com/us/reagents/research/antibodies-buffers/immunology-reagents/anti-human-antibodies/cell-surface-antigens/bv786-mouse-anti-human-cd8-rpa-t8/p/563823</a>                                       |
| CD95                  | BUV395       | DX2        | 0.16 µL               | BD Biosciences           | 740306     | <a href="https://www.bdbiosciences.com/en-us/products/reagents/flow-cytometry-reagents/research-reagents/single-color-antibodies-ruo/buv395-mouse-anti-human-cd95.740306">https://www.bdbiosciences.com/en-us/products/reagents/flow-cytometry-reagents/research-reagents/single-color-antibodies-ruo/buv395-mouse-anti-human-cd95.740306</a>                                                                       |
| HLA-DR                | BV510        | L243       | 0.6 µL                | BioLegend                | 307646     | <a href="https://www.biolegend.com/it-it/products/brilliant-violet-510-anti-human-hla-dr-antibody-8008">https://www.biolegend.com/it-it/products/brilliant-violet-510-anti-human-hla-dr-antibody-8008</a>                                                                                                                                                                                                           |
| LAG3                  | FITC         | 11C3C65    | 5 µL                  | BioLegend                | 369308     | <a href="https://www.biolegend.com/en-us/products/fic-anti-human-cd223-lag-3-antibody-13550?GroupID=BLG14890">https://www.biolegend.com/en-us/products/fic-anti-human-cd223-lag-3-antibody-13550?GroupID=BLG14890</a>                                                                                                                                                                                               |
| PD-1                  | BUV737       | EH12.1     | 2 µL                  | BD Biosciences           | 612791     | <a href="https://www.bdbiosciences.com/en-us/products/reagents/flow-cytometry-reagents/research-reagents/single-color-antibodies-ruo/buv737-mouse-anti-human-cd279-pd-1.612791">https://www.bdbiosciences.com/en-us/products/reagents/flow-cytometry-reagents/research-reagents/single-color-antibodies-ruo/buv737-mouse-anti-human-cd279-pd-1.612791</a>                                                           |
| TIGIT                 | PerCP Cy5.5  | MBSA43     | 5 µL                  | Thermo Fisher            | 46-9500-42 | <a href="https://www.thermofisher.com/antibody/product/TIGIT-Antibody-clone-MBSA43-Monoclonal/46-9500-42">https://www.thermofisher.com/antibody/product/TIGIT-Antibody-clone-MBSA43-Monoclonal/46-9500-42</a>                                                                                                                                                                                                       |
| TIM3                  | BV711        | 7D3        | 0.16 µL               | BD Biosciences           | 565566     | <a href="https://www.bdbiosciences.com/eu/applications/research/t-cell-immunology/th-2-cells/surface-markers/human/bv711-mouse-anti-human-tim-3-cd366-7d3/p/565566">https://www.bdbiosciences.com/eu/applications/research/t-cell-immunology/th-2-cells/surface-markers/human/bv711-mouse-anti-human-tim-3-cd366-7d3/p/565566</a>                                                                                   |
| Fixable viability dye | FVS780       | -          | 1:1000                | BD Biosciences           | 565388     | <a href="https://www.bdbiosciences.com/en-us/products/reagents/flow-cytometry-reagents/research-reagents/single-color-antibodies-ruo/fixable-viability-stain-780.565388">https://www.bdbiosciences.com/en-us/products/reagents/flow-cytometry-reagents/research-reagents/single-color-antibodies-ruo/fixable-viability-stain-780.565388</a>                                                                         |
| CD22-Fc-biotin        | -            | -          | 10 µg/mL              | Avitag Acro Biosystems   | SI2-H82F8  | <a href="https://www.acrobiosystems.com/P2524-Biotinylated-Human-Siglec-2--CD22-Protein-FcAvitag%E2%84%A2-%28MALIS-verified%29.html">https://www.acrobiosystems.com/P2524-Biotinylated-Human-Siglec-2--CD22-Protein-FcAvitag%E2%84%A2-%28MALIS-verified%29.html</a>                                                                                                                                                 |
| HD37 anti-idiotypic   | PE           | -          | 2.5 µL                | In house                 | -          | Anti-idiotypic antibody to HuHD37 was generated via murine immunisation and hybridoma screening. Binding specificity for HuHD37 CAR was assessed in comparison to non-relevant CARs                                                                                                                                                                                                                                 |
| Streptavidin          | AF647        | -          | 1:50                  | BioLegend                | 405237     | <a href="https://www.biolegend.com/en-gb/products/alexa-fluor-647-streptavidin-9305?GroupID=GROUP23">https://www.biolegend.com/en-gb/products/alexa-fluor-647-streptavidin-9305?GroupID=GROUP23</a>                                                                                                                                                                                                                 |
| anti-His              | -            | H3         | 1 µg/mL               | Santa Cruz Biotechnology | sc-8036    | <a href="https://www.scbt.com/p/his-probe-antibody-h-3">https://www.scbt.com/p/his-probe-antibody-h-3</a>                                                                                                                                                                                                                                                                                                           |

**Supplementary Table 1. Antibodies.** List of antibodies used in this study including catalogue identifier, working volumes and method of validation.

# Supplementary Figures 1

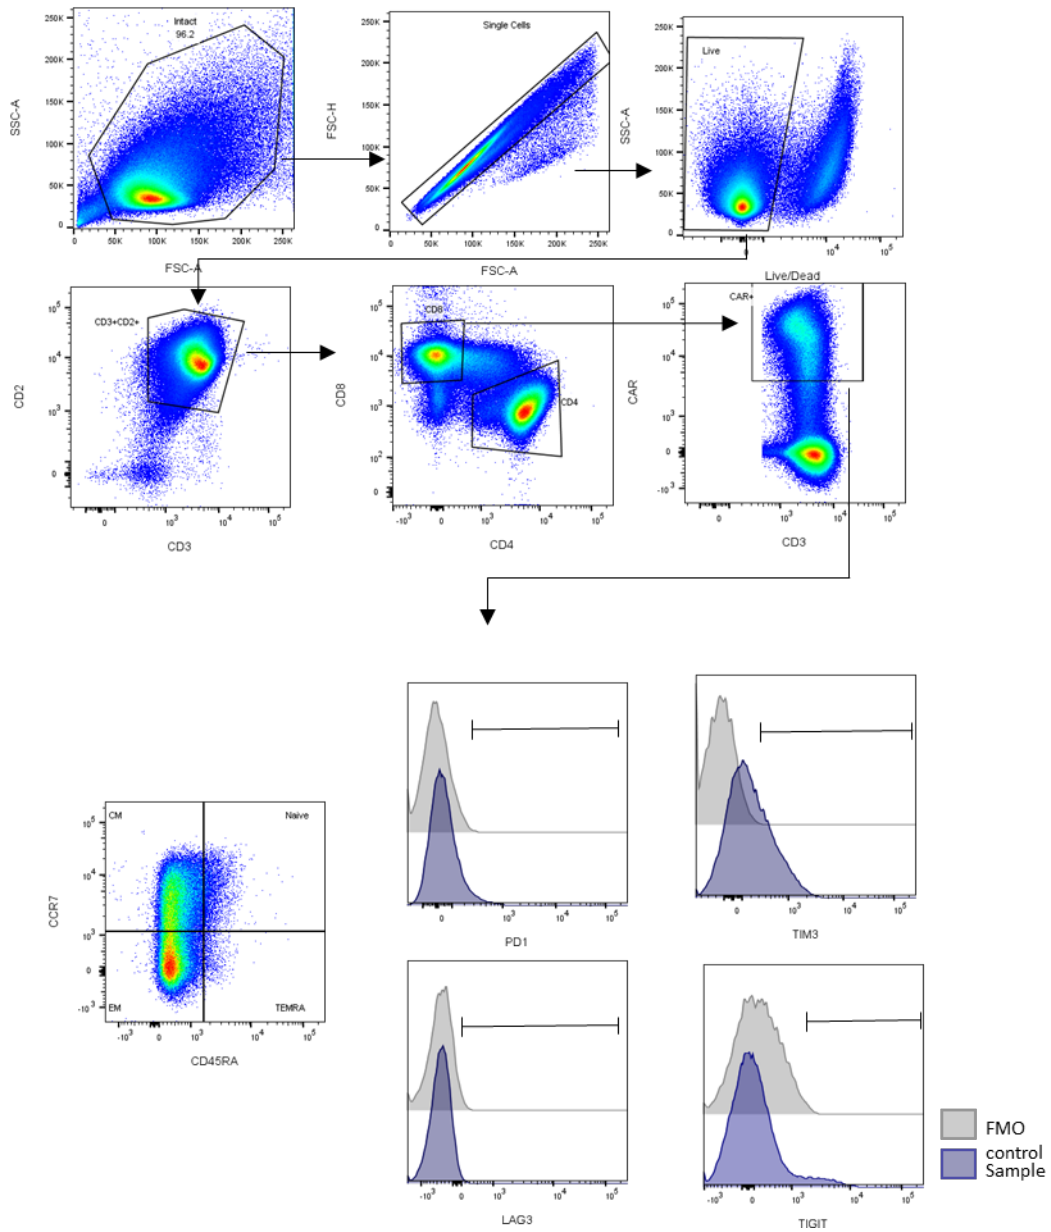

**Supplementary Figure 1. Gating strategy for memory and exhaustion phenotypes.** Representative example of gating hierarchy employed for the analysis of memory and exhaustion phenotypes in CAR T cell products. Example shows phenotyping of CD8+ CAR T cells; the same analysis was done with CD4+ CAR T cells.

# Supplementary Figures 2

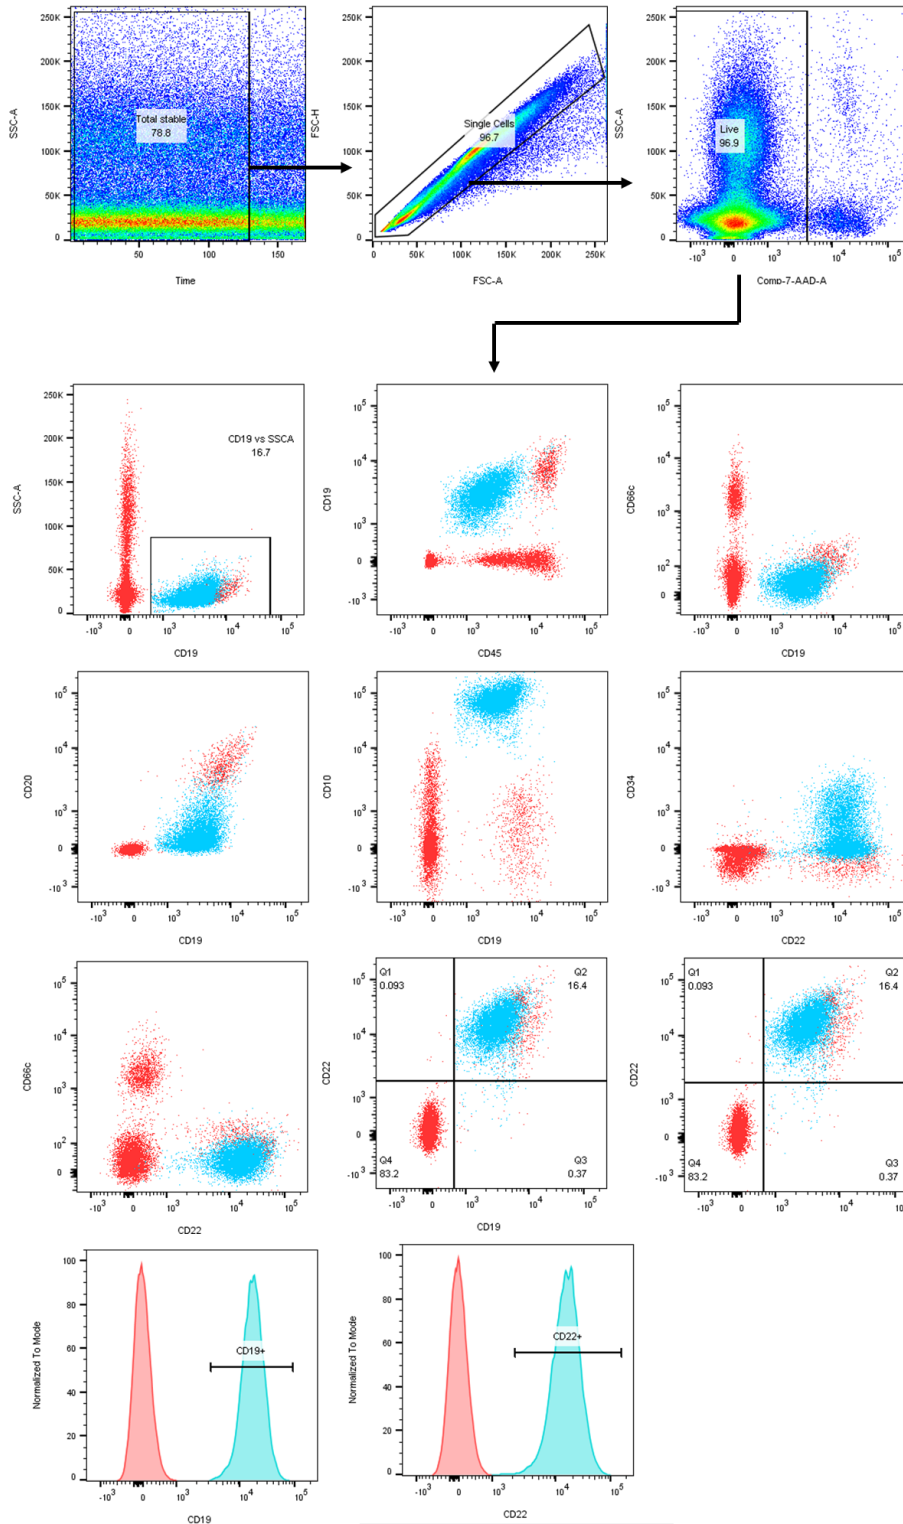

**Supplementary Figure 2. Gating strategy for leukemic blasts in bone marrow.** Representative example of gating hierarchy employed for the analysis of leukemic blasts in the bone marrow. Blast population is shown in light blue and total live cells are shown in red.
